# Supplementary material
Source: ML conference proceedings conference paper supplement (https://openreview.net/forum?id=BElx3S8s5e9)
Supplement: supplementary_material [file attachment]

| $P(Y X)$ | $X = 1$ | $X = 2$ | $X = 3$ |
|----------|---------|---------|---------|
| $Y = 1$  | 0.16    | 0.84    | 0.16    |
| $Y = 2$  | 0.34    | 0.14    | 0.34    |
| $Y = 3$  | 0.50    | 0.02    | 0.50    |

×

| $X$ | $P(X)$ |
|-----|--------|
| 1   | 0.25   |
| 2   | 0.25   |
| 3   | 0.50   |

(a)

| $P(X, Y)$ | $X = 1$ | $X = 2$ | $X = 3$ |
|-----------|---------|---------|---------|
| $Y = 1$   | 0.040   | 0.210   | 0.080   |
| $Y = 2$   | 0.085   | 0.035   | 0.170   |
| $Y = 3$   | 0.125   | 0.005   | 0.250   |

(b)

| $P(X Y)$ | $Y = 1$ | $Y = 2$ | $Y = 3$ |
|----------|---------|---------|---------|
| $X = 1$  | 0.12    | 0.29    | 0.33    |
| $X = 2$  | 0.64    | 0.12    | 0.01    |
| $X = 3$  | 0.24    | 0.59    | 0.66    |

×

| $Y$ | $P(Y)$ |
|-----|--------|
| 1   | 0.33   |
| 2   | 0.29   |
| 3   | 0.38   |

(c)

| $\hat{P}(X, Y)$ | $X = 1$ | $X = 2$ | $X = 3$ |
|-----------------|---------|---------|---------|
| $Y = 1$         | 0.104   | 0.087   | 0.141   |
| $Y = 2$         | 0.065   | 0.071   | 0.154   |
| $Y = 3$         | 0.078   | 0.089   | 0.211   |

(d)
